# Supplementary material for: Manganese oxide nanostructures: low-temperature selective synthesis and thermal conversion
Source: Royal Society of Chemistry journal article supplement (doi:10.1039/c5ra02241j), 2015-01-01
Supplement: c5ra02241j1.pdf [file c5ra02241j1.pdf]

## Supporting Information

### Manganese oxide nanostructures: low-temperature selective synthesis and thermal conversion

Leilei Lan<sup>a,b</sup>, Guangrui Gu<sup>b</sup>, Quanjun Li<sup>a\*</sup>, Huafang Zhang<sup>a</sup>, Ke Xu<sup>a</sup>, Bo Liu<sup>a</sup>, and Bingbing Liu<sup>a</sup>

<sup>a</sup> State Key Laboratory of Superhard Materials, Jilin University, Changchun 130012, P. R. China

<sup>b</sup> Department of Physics, College of Science, Yanbian University, Yanji 133002, P. R. China

\* Corresponding author email: [Liquanjuan@jlu.edu.cn](mailto:Liquanjuan@jlu.edu.cn).

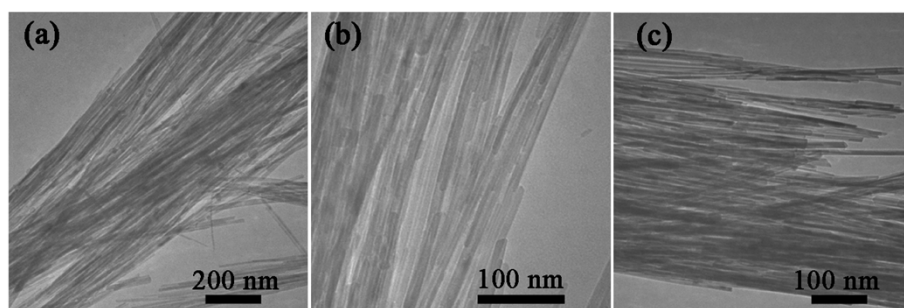

**Figure S1.** TEM images of the  $\gamma$ -MnOOH prepared at different temperatures: (a) RT, (b) 40 °C, and (c) 80 °C.

Figure S1 shows the TEM images of  $\gamma$ -MnOOH prepared at different temperatures. We can see that the morphologies of  $\gamma$ -MnOOH synthesized at other temperatures (RT, 40 °C, and 80 °C) also have the bundle-like structures.

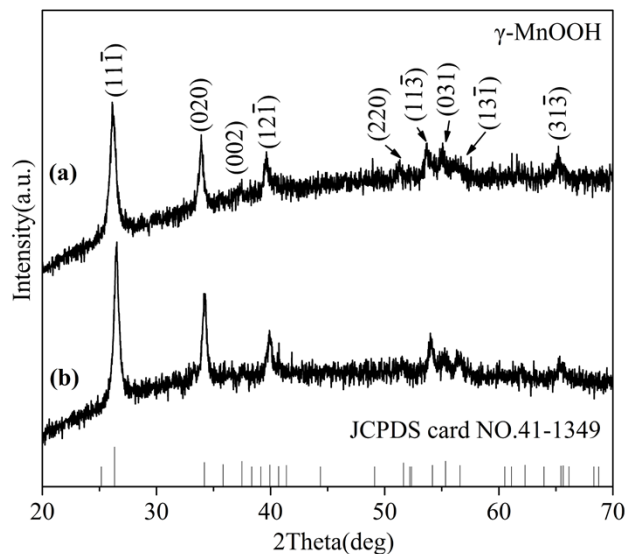

**Figure S2.** XRD patterns of the products prepared by other caustic alkalis: (a) KOH and (b)  $\text{LiOH}\cdot\text{H}_2\text{O}$ .

Figure S2 shows XRD patterns of the products prepared by other caustic alkalis. From the XRD patterns, the  $\gamma\text{-MnOOH}$  are also obtained when comparative experiments are performed by substituting NaOH with the same mass of KOH and  $\text{LiOH}\cdot\text{H}_2\text{O}$ .

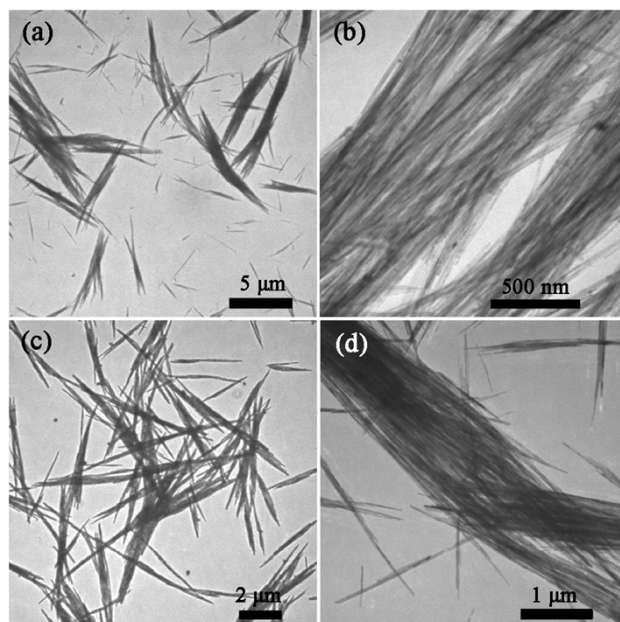

**Figure S3.** TEM images of the products prepared by other caustic alkalis: (a, b) KOH

and (c, d)  $\text{LiOH}\cdot\text{H}_2\text{O}$ .

Figure S3 shows the TEM images of the products prepared by other caustic alkalis. Bundle-like  $\gamma\text{-MnOOH}$  structures are also obtained when comparative experiments are performed by substituting NaOH with the same mass of KOH and  $\text{LiOH}\cdot\text{H}_2\text{O}$ .
